# Supplementary material for: Speciation of metal-based nanomaterials in human serum characterized by capillary electrophoresis coupled to ICP-MS: a case study of gold nanoparticles
Source: Royal Society of Chemistry journal article supplement (doi:10.1039/c5mt00109a), 2015-01-01
Supplement: c5mt00109a1.pdf [file c5mt00109a1.pdf]

## Supporting information

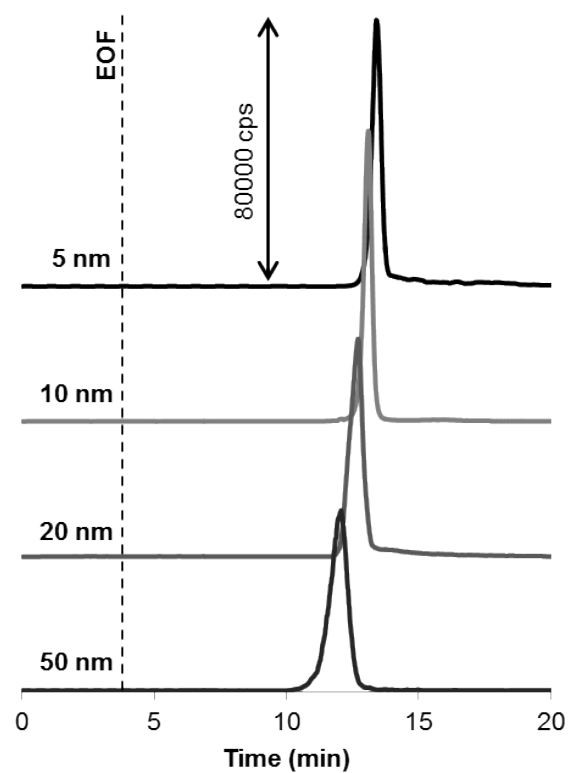

**Fig. S-1** Representative electropherograms for gold nanoparticles of varying size ( $9.5 \text{ mg L}^{-1} \text{ Au}$ ) obtained with CE-ICP-MS. See Table 1 and Experimental section for conditions.

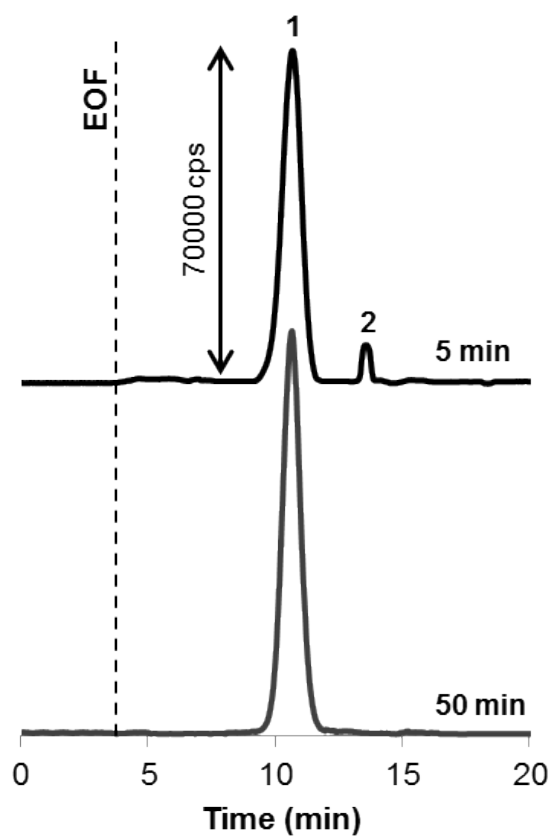

**Fig. S-2** CE-ICP-MS electropherograms of 5-nm gold particles interacting with albumin under simulated physiological conditions (10 mM phosphate buffer, pH 7.4, 100 mM NaCl). Sample: 9.5 mg L<sup>-1</sup> gold nanoparticles, 19 mg L<sup>-1</sup> albumin. Peak assignment: 1 – albumin conjugate; 2 – gold nanoparticles. EOF = electroosmotic flow. See Table 1 and Experimental section for CE-ICP-MS conditions.

**Table S-1** Binding of gold nanoparticles to transferrin

| Nanoparticle<br>concentration<br>(mg L <sup>-1</sup> Au) | 19                                  | 38               |
|----------------------------------------------------------|-------------------------------------|------------------|
|                                                          | Relative peak area (%) <sup>a</sup> |                  |
| Size (nm)                                                | Apo-transferrin                     | Holo-transferrin |
| 5                                                        | ND <sup>b</sup>                     | ND               |
| 10                                                       | 1.9±0.2                             | ND               |
| 20                                                       | 5.1±0.2                             | 1.7±0.1          |
| 50                                                       | 7.6±0.3                             | 3.9±0.2          |

<sup>a</sup> Calculated on the basis of measurements made after 30-min incubation;  $n = 3$ .

<sup>b</sup> Not detected.
